# Supplementary material
Source: HighWire-hosted journal article supplement (https://www.jneurosci.org/content/41/21/4697)
Supplement: inline-supplementary-material-15 [file inline-supplementary-material-15.xlsx]

## Sheet: Extended Table 5-6
Table 5-6. Pathway analysis of nonresponder mice
p-value	FDR	pathway	source	external_id	members_input_overlap	members_input_overlap_geneids	effective_size
3.15034e-05	0.00472551	Transcriptional regulation of white adipocyte differentiation	Wikipathways	WP2751	PCK1; FABP4; SLC2A4	6517; 2167; 5105	15
0.000173416	0.00848706	Integrin	INOH	None	VAV1; COL9A2; COL12A1; FN1; COL1A1	1277; 1298; 2335; 7409; 1303	124
0.000224141	0.00848706	Adipogenesis	Wikipathways	WP236	PCK1; CFD; SLC2A4; WNT10B; PTGIS	5740; 1675; 6517; 7480; 5105	131
0.000226322	0.00848706	Extracellular matrix organization	Reactome	R-HSA-1474244	BMP7; FN1; ASPN; COL9A2; FMOD; COL1A1; COL12A1	54829; 1277; 1298; 2335; 2331; 655; 1303	294
0.00084069	0.0252207	Collagen chain trimerization	Reactome	R-HSA-8948216	COL9A2; COL12A1; COL1A1	1277; 1303; 1298	44
0.00149825	0.0372697	Focal adhesion - Homo sapiens (human)	KEGG	path:hsa04510	VAV1; COL1A1; COL9A2; FN1; MYL9	10398; 2335; 7409; 1277; 1298	199
0.00178661	0.0372697	ECM proteoglycans	Reactome	R-HSA-3000178	ASPN; COL9A2; FMOD	54829; 2331; 1298	57
0.00238174	0.0372697	Arachidonic acid metabolism - Homo sapiens (human)	KEGG	path:hsa00590	GPX8; PLA2G4A; PTGIS	493869; 5321; 5740	63
0.00257738	0.0372697	miR-509-3p alteration of YAP1-ECM axis	Wikipathways	WP3967	FN1; COL1A1	2335; 1277	18
0.0028728	0.0372697	Overview of nanoparticle effects	Wikipathways	WP3287	CDH3; FN1	2335; 1001	19
0.00296135	0.0372697	Collagen biosynthesis and modifying enzymes	Reactome	R-HSA-1650814	COL9A2; COL12A1; COL1A1	1277; 1303; 1298	68
0.00298157	0.0372697	PI3K-Akt Signaling Pathway	Wikipathways	WP4172	PCK1; FN1; COL9A2; IL3RA; COL1A1; LPAR4	2846; 3563; 5105; 1277; 2335; 1298	339
0.00363951	0.0396276	PI3K-Akt signaling pathway - Homo sapiens (human)	KEGG	path:hsa04151	PCK1; FN1; COL9A2; IL3RA; COL1A1; LPAR4	2335; 2846; 5105; 1277; 1298; 3563	353
0.00390776	0.0396276	Transcriptional regulation by RUNX2	Reactome	R-HSA-8878166	DLX5; SP7; COL1A1	1277; 121340; 1749	75
0.00420459	0.0396276	Eicosanoid Synthesis	Wikipathways	WP167	PLA2G4A; PTGIS	5740; 5321	23
0.00457442	0.0396276	RUNX2 regulates osteoblast differentiation	Reactome	R-HSA-8940973	SP7; COL1A1	1277; 121340	24
0.00475265	0.0396276	Platelet activation, signaling and aggregation	Reactome	R-HSA-76002	CLEC3B; VAV1; PLA2G4A; CFD; FN1	7123; 2335; 5321; 1675; 7409	260
0.00495876	0.0396276	VEGFR3 signaling in lymphatic endothelium	PID	lymphangiogenesis_pathway	FN1; COL1A1	1277; 2335	25
0.0050195	0.0396276	ECM-receptor interaction - Homo sapiens (human)	KEGG	path:hsa04512	COL9A2; FN1; COL1A1	1298; 2335; 1277	82
0.00619754	0.0431843	Keratan sulfate biosynthesis	Reactome	R-HSA-2022854	FMOD; OMD	4958; 2331	28
0.0065023	0.0431843	Protein digestion and absorption - Homo sapiens (human)	KEGG	path:hsa04974	COL9A2; COL12A1; COL1A1	1277; 1298; 1303	90
0.0065023	0.0431843	Fc gamma R-mediated phagocytosis - Homo sapiens (human)	KEGG	path:hsa04666	VAV1; PLA2G4A; MARCKS	5321; 7409; 4082	90
0.00670404	0.0431843	Amino Acid metabolism	Wikipathways	WP3925	AOC3; PCK1; ASNS	8639; 5105; 440	91
0.00690948	0.0431843	Collagen formation	Reactome	R-HSA-1474290	COL9A2; COL12A1; COL1A1	1277; 1298; 1303	92
0.0080448	0.0456474	RUNX2 regulates bone development	Reactome	R-HSA-8941326	SP7; COL1A1	1277; 121340	32
0.00854073	0.0456474	Inflammatory Response Pathway	Wikipathways	WP453	FN1; COL1A1	1277; 2335	33
0.00854073	0.0456474	Keratan sulfate/keratin metabolism	Reactome	R-HSA-1638074	FMOD; OMD	4958; 2331	33
0.00884017	0.0456474	Focal Adhesion-PI3K-Akt-mTOR-signaling pathway	Wikipathways	WP3932	SLC2A4; IL3RA; FN1; LPAR4; COL1A1	2846; 3563; 1277; 2335; 6517	302
0.00905007	0.0456474	BMP signaling Dro	INOH	None	BMP7; WT1	655; 7490	34
0.00957269	0.0456474	Role of Osx and miRNAs in tooth development	Wikipathways	WP3971	BMP7; SP7	655; 121340	35
0.00957269	0.0456474	Collagen degradation	Reactome	R-HSA-1442490	COL9A2; COL12A1	1303; 1298	35
0.00973812	0.0456474	Focal Adhesion	Wikipathways	WP306	VAV1; COL1A1; FN1; MYL9	10398; 2335; 7409; 1277	198
